# Supplementary material for: Proteomic analysis of lung cancer cells reveals a critical role of BCAT1 in cancer cell metastasis
Source: PubMed Central journal article supplement (PMC8490523; doi:10.7150/thno.61731), 2021-09-27
Supplement: thnov11p9705s1.pdf [file thnov11p9705s1.pdf]

# **Proteomic analysis of lung cancer cells reveals a critical role of BCAT1 in cancer cell metastasis**

Lin Mao<sup>1</sup>, Jin Chen<sup>1</sup>, Xue Lu<sup>1</sup>, Canlin Yang<sup>2</sup>, Yi Ding<sup>1</sup>, Mingming Wang<sup>3</sup>, Yunpeng Zhang<sup>1</sup>, Yuying Tian<sup>1</sup>, Xing Li<sup>2</sup>, Yunyun Fu<sup>1</sup>, Yueying Yang<sup>1</sup>, Yunyun Gu<sup>3</sup>, Fei Gao<sup>3</sup>, Junxing Huang<sup>2</sup>, Lujian Liao<sup>1\*</sup>

<sup>1</sup>Shanghai Key Laboratory of Regulatory Biology, School of Life Sciences, East China Normal University, Shanghai 200241, China.

<sup>2</sup>Department of Oncology, Taizhou People's Hospital, Affiliated to Nanjing University of Chinese Medicine, Taizhou, Jiangsu 225300, China

<sup>3</sup>Durbrain Medical Laboratory, Hangzhou, Zhejiang 310000, China.

\*Corresponding author: [ljliao@bio.ecnu.edu.cn](mailto:ljliao@bio.ecnu.edu.cn)

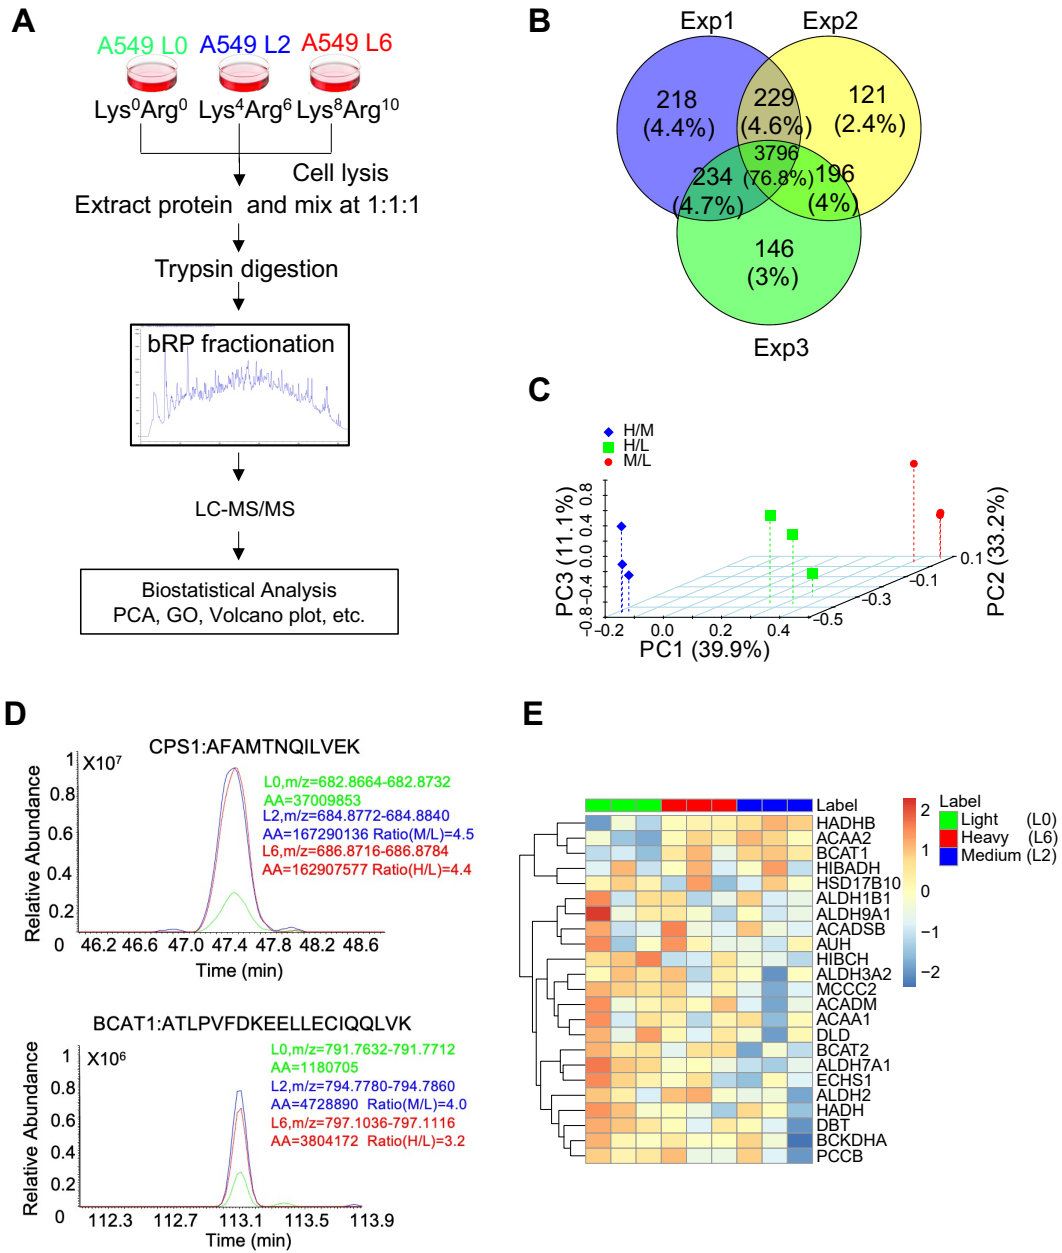

**Figure S1.** Reproducibility and accuracy of SILAC-based quantitative proteomics. **(A)** Schematic workflow of triple-labeling SILAC. **(B)** Overlaps of quantified proteins in three biological replicates. **(C)** Principal component analysis of SILAC ratio, L: light (L0); M: medium (L2); H: heavy (L6). **(D)** Reconstructed chromatograms of unique peptides of CPS1 and BCAT1 in L2 (blue) and L6 (red) cells. **(E)** The expression of enzymes involved in BCAA metabolism.

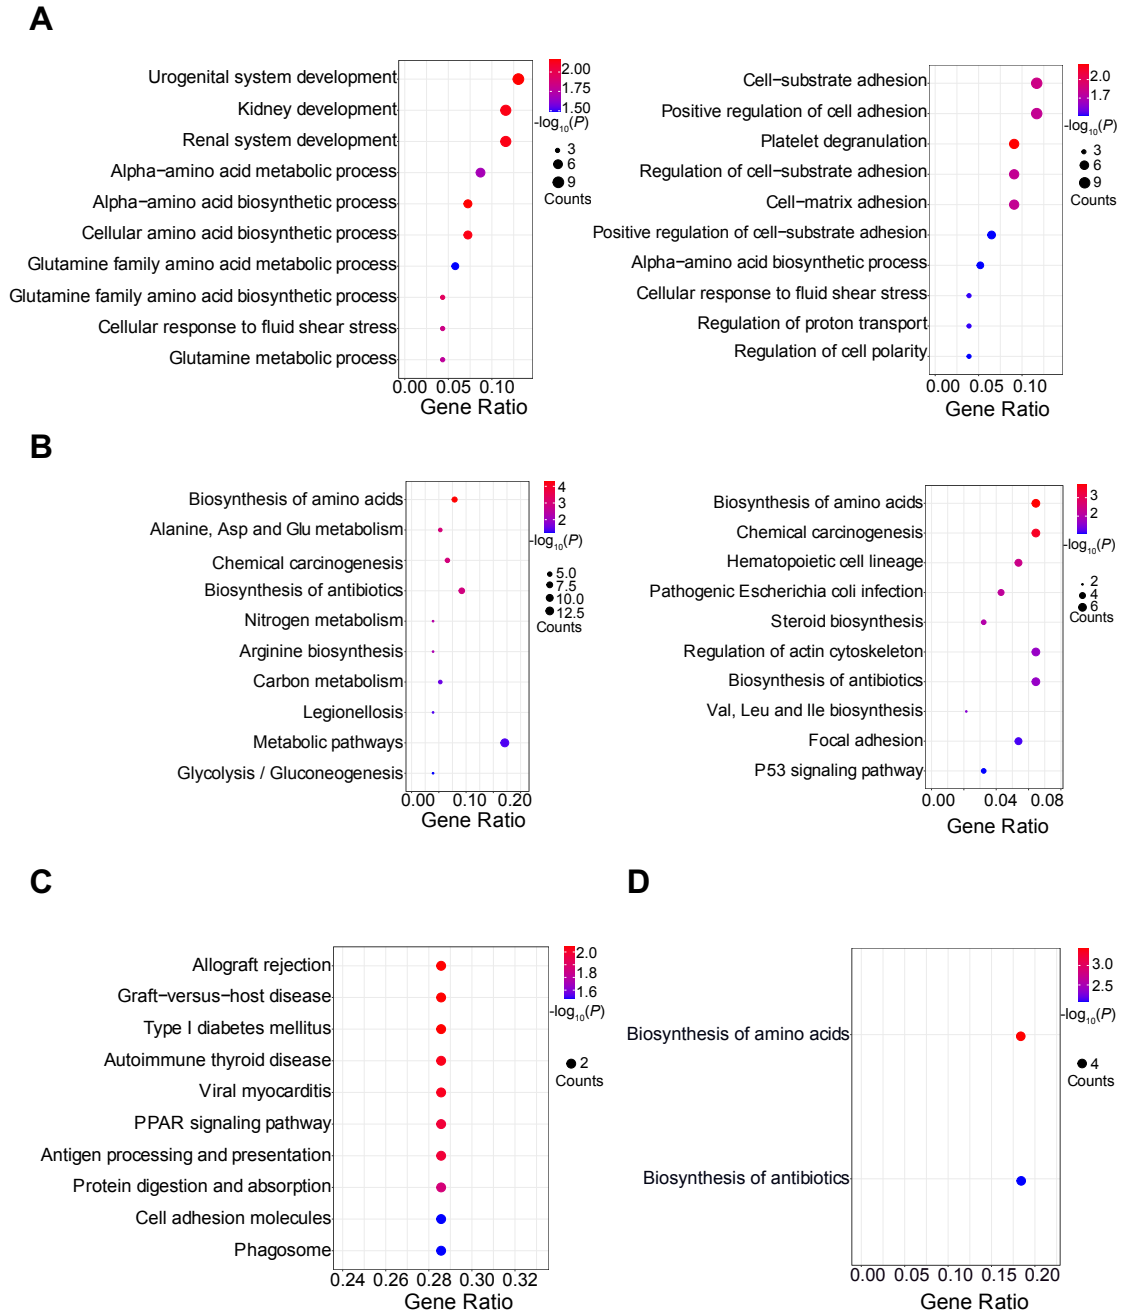

**Figure S2.** Enrichment analysis of differentially expressed proteins. **(A)** Gene ontology enrichment analysis of significantly changed proteins in heavy (L6) and medium (L2) comparing to light (L0) cells. Fold change > 1.5 or < 0.67 was used as the cutoff.  $P < 0.05$ . **(B)** KEGG pathway analysis of significantly changed proteins. **(C)** KEGG pathway analysis of significantly changed proteins from patient tissue samples. **(D)** KEGG pathway analysis of 21 proteins significantly changed in cell line and quantified in human samples.

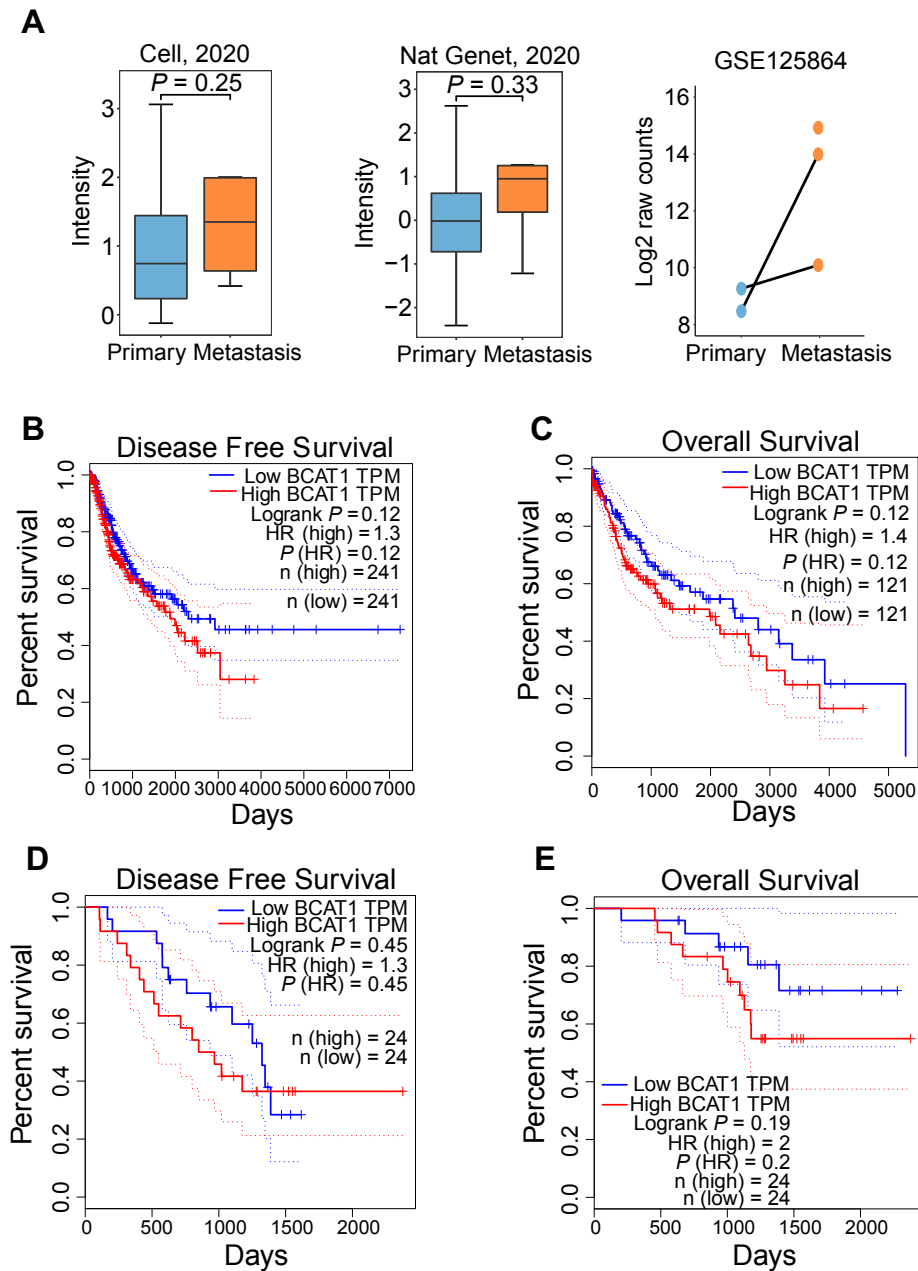

**Figure S3.** NSCLC patient survival stratified by BCAT1 expression. **(A)** Boxplot and dotplot for BCAT1 expression in 3 datasets [5, 32, 33]. The data from Cell, 2020 was analyzed using Wilcoxon rank sum test since it failed the normality test, and the data from Nat Genet, 2020 was analyzed using Student's  $t$ -test. **(B)** DFS of LUAD and LUSC patients stratified by 75 quantile expression of BCAT1 from the TCGA datasets. **(C)** OS of LUSC patients stratified by 75 quantile expression of BCAT1. **(D and E)** DFS and OS curves using the dataset from Cell, 2020 [4].

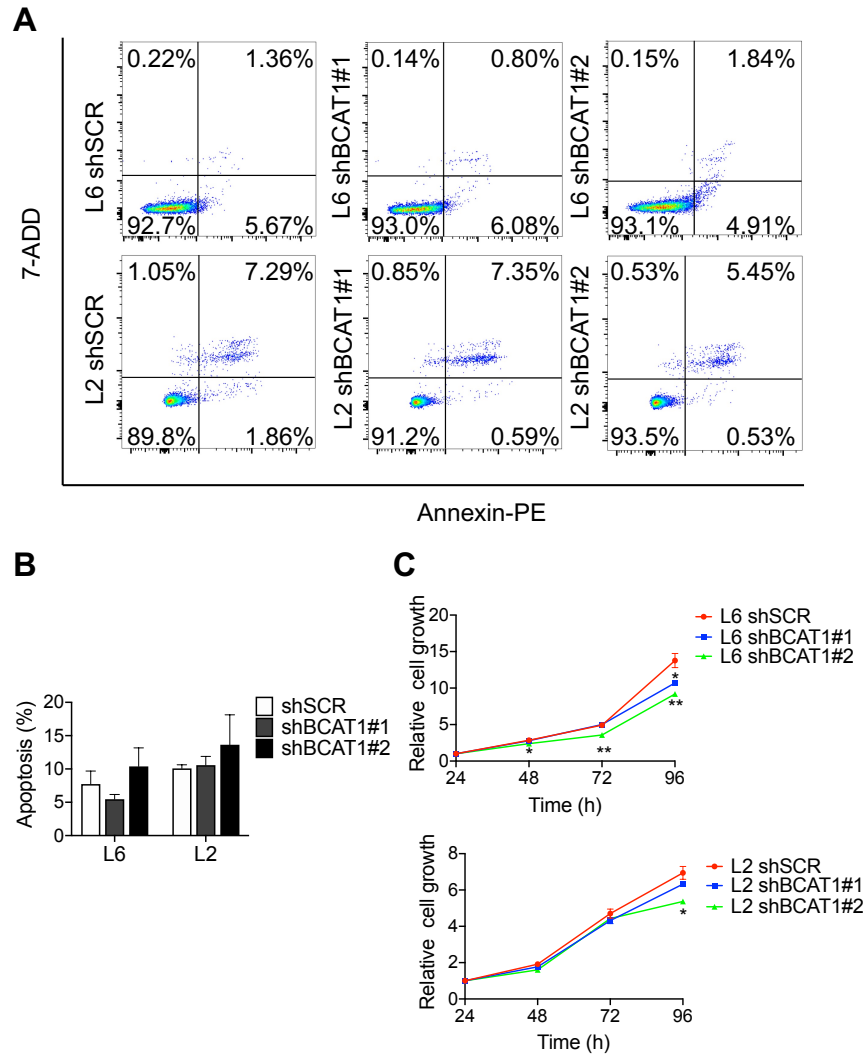

**Figure S4.** The effect of knocking down BCAT1 on cell proliferation and apoptosis. **(A)** FACS analysis of A549 cells after co-staining with annexin-PE and 7-ADD. Annexin-PE positive and 7-ADD positive or negative cells were counted as apoptotic cells.  $n = 3$ . **(B)** Student's  $t$ -test analysis of data from (A). **(C)** Growth curve of cells expressing either scrambled shRNA or shBCAT1. \*  $P < 0.05$ ,  $n = 3$ .

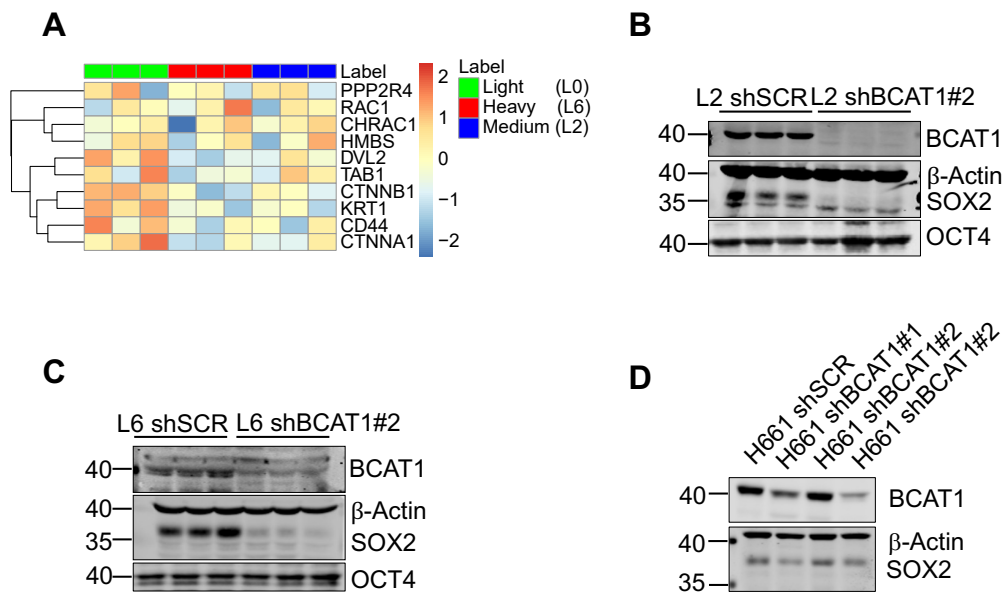

**Figure S5.** Expression of EMT markers and stemness factors. **(A)** Expression of protein involved in Wnt signaling from SILAC data. **(B, C)** Western blot analysis of SOX2 and OCT4 in L2 (B) and L6 (C) cells after knocking down BCAT1 with the second targeting sequence. **(D)** Western blot of SOX2 in H661 cells expressed sh-BCAT1.

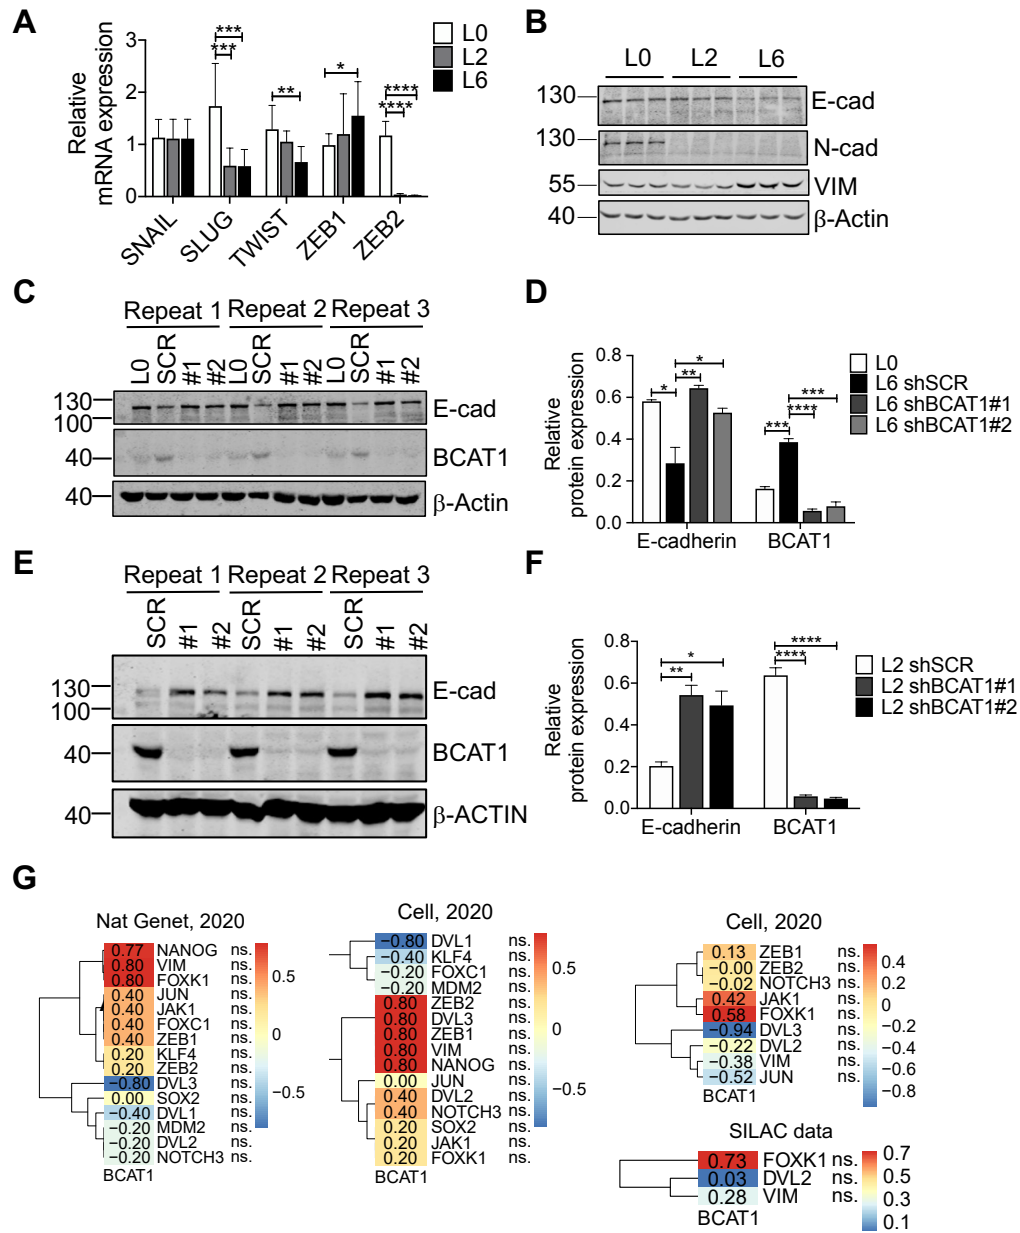

**Figure S6.** Expression of EMT markers and transactors. **(A-B)** Relative mRNA expression of EMT related transcription factors (A) and protein markers (B) in A549 cells. **(C-F)** Expression of E-cadherin at the protein level in L2 and L6 cells expressing shBCAT1. **(G)** Correlation analysis between BCAT1 and EMT- or stemness-associated genes from RNA-seq data (left and middle) [32], or proteomic data (right) [5], as well as our SILAC data. Correlation coefficients were shown in the box and *P* values were shown on the side. ns.: none significant. RNA-seq data from Nat Genet, 2020 and Cell, 2020 were analyzed using Spearman's rank correlation, while the other two were analyzed using Pearson correlation.

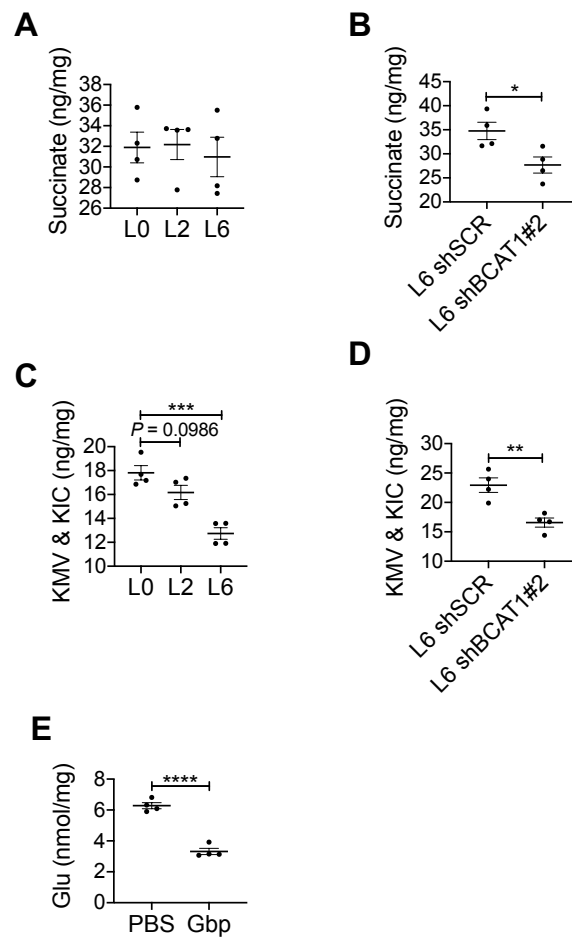

**Figure S7.** Quantification of succinate and BCKAs. **(A-B)** Cellular succinate levels normalized to total protein among of cells. n=4. **(C-D)** Cellular levels of keto-acid KMV and KIC normalized to total protein among of cells. Since the two isoforms were not separable by either HPLC or by MS, the summed intensities were measured. **(E)** Cellular glutamate concentration treated with or without gabapentin (20 mM, 24 h).



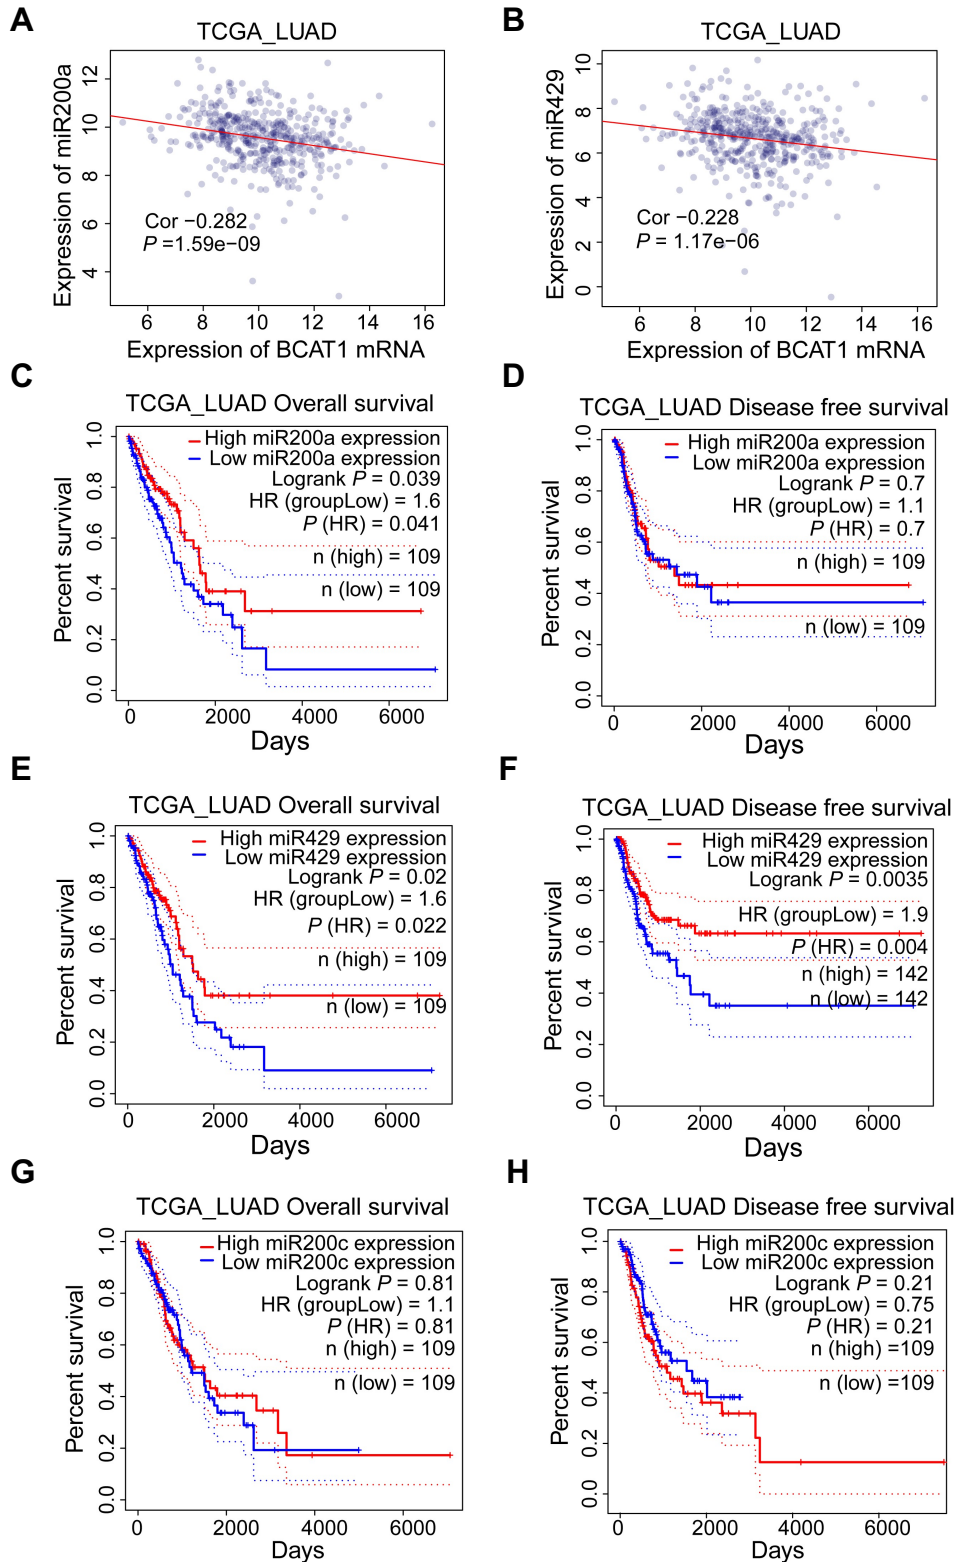

**Figure S8.** MiR200 family members predict prognosis of NSCLC patients. **(A-B)** Pearson correlation analysis between BCAT1 and miR200 family members miR200a (A) or miR429 (B). **(C-H)** Kaplan-Meier OS or DFS curve of LUAD patients stratified by 75% quantile expression of miR200 family members. The expression data and patient information were downloaded from the TCGA datasets.

**Table S1. Primer sequences for all experiments.**

| Gene                                  | Primer sequence forward 5'-3'                                 | Primer sequence reverse 5'-3'                                 |
|---------------------------------------|---------------------------------------------------------------|---------------------------------------------------------------|
| For QPCR                              |                                                               |                                                               |
| BCAT1                                 | GTGGAGTGGTCTCAGAGTTT                                          | AGCCAGGGTGCAATGACAG                                           |
| CPS1                                  | AATGAGGTGGGCTTAAAGCAAG                                        | AGTTCCACTCCACAGTTCAGA                                         |
| PYCARD                                | TGGATGCTCTGTACGGGAAG                                          | CCAGGCTGGTGTGAAACTGAA                                         |
| ASS1                                  | TCCGTGGTTCTGGCCTACA                                           | GGCTTCCTCGAAGCTTCCTT                                          |
| TAGLN                                 | AGTGCACTCCAAAATCGAGAAG                                        | CTTGCTCAGAATCACGCCAT                                          |
| SOX2                                  | CGAGTGAAACTTTTGTGCGGA                                         | TGTGCAGCGCTCGCAG                                              |
| OCT4                                  | ACCGAGTGAGAGGCAACC                                            | TGAGAAAGGAGACCCAGCAG                                          |
| NANOG                                 | CAACCAGACCCAGAACATCC                                          | TTCCAAAGCAGCCTCCAAG                                           |
| SNAIL                                 | CTTCCAGCAGCCCTACGAC                                           | CTGAGGATCTCTGTTGTGGT                                          |
| SLUG                                  | AGATGCATATTCGGACCCAC                                          | CCTCATGTTTGTGCAGGAGA                                          |
| TWIST                                 | GCCAGGTACATCGACTTCCTCT                                        | TCCATCCTCCAGACCGAGAAGG                                        |
| ZEB1                                  | GATGATGAATGCGAGTCAGATGC                                       | ACAGCAGTGTCTTGTGTTGT                                          |
| ZEB2                                  | CAAGAGGCGCAAACAAGCC                                           | GGTTGGCAATACCGTCATCC                                          |
| miR200c-3p                            | ACACTCCAGCTGGG UAAUACUGCCGGGUAAUGA                            | CTCAACTG GTGTCGTGGA                                           |
| miR-429                               | ACACTCCAGCTGGG TAATACTGTCTGGTAAAA                             | CTCAACTG GTGTCGTGGA                                           |
| miR21-5p                              | ACACTCCAGCTGGGTAGCTTAT<br>CAGACTGATG                          | CTCAACTG GTGTCGTGGA                                           |
| U6                                    | CTCGCTTCGGCAGCACA                                             | AACGCTTCACGAATTTGCGT                                          |
| For reverse transcription (Stem-loop) |                                                               |                                                               |
| miR-200c-3p                           | CTCAACTGGTGTGTCGTGGAGTCGGCAATTCAGTTGAG TCCATCAT               |                                                               |
| miR-429                               | CTCAACTGGTGTGTCGTGGAGTCGGCAATTCAGTTGAG ACGGTTTT               |                                                               |
| miR21-5p                              | CTCAACTGGTGTGTCGTGGAGTCGGCAATTCAGTTGAG TCAACATC               |                                                               |
| U6                                    | AACGCTTCACGAATTTGCGT                                          |                                                               |
| For BCAT1 knock down                  |                                                               |                                                               |
| shBCAT1#1                             | CCGGCCCAATGTGAAGCAGTAGATACTC<br>GAGTATCTACTGCTTCACATTGGGTTTTT | AATTA AAAACCAATGTGAAGCAGTAGA<br>TACTCGAGTATCTACTGCTTCACATTGGG |
| shBCAT1#2                             | CCGGCCTGTGTTGTTGCCAGTTTCTC<br>GAGAACTGGGCAAACAACACAGTTTTT     | AATTA AAAACCTGTGTTGTTGCCAGT<br>TTCTCGAGAACTGGGCAAACAACACAGG   |

**Table S4. Clinical information for samples analyzed by TMT-based proteomics**

| Patient No.    | Age | Sex | Metastatic site              | Primary site                | Histological type                                                            | Therapy                                              |
|----------------|-----|-----|------------------------------|-----------------------------|------------------------------------------------------------------------------|------------------------------------------------------|
| FFPE sections  |     |     |                              |                             |                                                                              |                                                      |
| No.1           | 65  | M   | Chest wall                   | Superior lobe of left lung  | Lung squamous carcinoma                                                      | Radiotherapy                                         |
| No.2           | 53  | M   | Lymph node of right cervical | Superior lobe of left lung  | Neuroendocrine neoplasm                                                      | Postoperative docetaxel and carboplatin chemotherapy |
| No.3           | 67  | F   | Lymph node of left cervical  | Inferior lobe of left lung  | Lung adenocarcinoma                                                          | Surgical operation                                   |
| No.4           | 65  | M   | Chest wall                   | Inferior lobe of left lung  | Lung squamous carcinoma                                                      | Docetaxel and carboplatin chemotherapy               |
| Frozen tissues |     |     |                              |                             |                                                                              |                                                      |
| No.5           | 62  | F   | None                         | Superior lobe of right lung | Papillary infiltrating adenocarcinoma                                        | Surgical operation                                   |
| No.6           | 61  | F   | lymph node                   | Superior lobe of right lung | Papillary infiltrating adenocarcinoma, with acinar type, micropapillary type | Surgical operation                                   |
